# Supplementary material
Source: publisher site journal article supplement (https://www.dovepress.com/article/546424)
Supplement: Supplementary file 1 [file supplement%20material.docx]

Table S1 Preoperative baseline data of non-jaundice group and jaundice group

|  | Non-jaundice group、 (n=151) | Jaundice group  (n=141) | *P* value |
| --- | --- | --- | --- |
| Preoperative TB(μmol/L) | 17.66±2.41 | 142.85±92.03 | <0.001 a * |
| Preoperative ALT(U/L) | 39.50±58.99 | 139.21±115.98 | <0.001 a * |
| Preoperative ALB(g/L) | 38.61±4.74 | 35.16±3.51 | <0.001 a * |
| Preoperative HGB(g/L) | 132.52±18.18 | 121.74±17.08 | <0.001 a * |
| Preoperative PT(s) | 12.58±9.73 | 11.99±1.26 | 0.477 a |
| Preoperative APTT(s) | 27.29±5.28 | 28.83±9.49 | 0.084 a |
| Duration of surgery(min) | 300.0(200.0,500.0) | 230.0(192.5,290.0) | 0.076 b |
| Blood loss(ml) | 300.00（200.00，500.00） | 300.0(200.0,550.0) | 0.141 b |

a T-test b Mann whitney test *Significant difference

Table S2 Preoperative baseline data of mild jaundiced group and severe jaundiced group

|  | | Mild jaundiced group(n=85) | Severe jaundiced group(n=56) | *P* value |
| --- | --- | --- | --- | --- |
| Gender(n) | |  |  |  |
|  | Male | 52(61.2%) | 38(67.9%) | 0.419 a |
| Female | 33(38.8%) | 18(32.1%) |
| Age(y) | | 61.24±10.28 | 64.11±7.79 | 0.077 b |
| BMI(kg/m2) | | 24.02±3.10 | 23.84±2.92 | 0.734 b |
| Hypertension(n) | | 31(36.5%) | 29(51.8%) | 0.235 a |
| Diabetes(n) | | 26(30.6%) | 15(26.8%) | 0.120 a |
| Highest TB(μmol/L) | | 140.28±65.23 | 369.85±115.02 | <0.001 b * |
| Preoperative TB(μmol/L) | | 111.24±66.69 | 190.83±104.30 | <0.001 b * |
| Preoperative ALT(U/L) | | 161.05±129.27 | 106.05±82.81 | 0.003 b * |
| Preoperative ALB(g/L) | | 35.45±3.64 | 34.71±3.29 | 0.221 b |
| Preoperative HGB(g/L) | | 124.36±17.70 | 117.77±15.40 | 0.024 b * |
| Preoperative PT(s) | | 11.71±1.07 | 12.42±1.40 | 0.001 b * |
| Preoperative APTT(s) | | 28.24±10.50 | 29.74±7.73 | 0.359 b |
| PBD (n) | | 46(54.1%) | 50(89.3%) | <0.001 a * |
| Surgical methods(n) | |  |  |  |
|  | Open | 58(68.2%) | 37(66.1%) | 0.828 a |
| Laparoscopic transfer opening | 4(4.7%) | 4(7.1%) |
| Laparoscopic | 23(27.1%) | 15(26.8%) |
| Duration of surgery(min) | | 230.0(190.0, 287.5) | 232.5(200.0, 297.5) | 0.362 c |
| Blood loss(ml) | | 300.0(200.0, 550.0) | 350.0(200.0, 575.0) | 0.685 c |

a Chi-square test b T-test c Mann whitney test *Significant difference

Table S3 Comparison of short-term postoperative complications between mild jaundiced group and severe jaundiced group

| Postoperative complications (n) | | Mild jaundiced group | Severe jaundiced group | *P* value |
| --- | --- | --- | --- | --- |
| (n=85) | (n=56) |
| Pancreatic fistula | |  |  |  |
|  | Non-CR-POPF | 68(80.0%) | 44(78.6%) | 0.713 a |
|  | Grade B | 11(12.9%) | 6(10.7%) |
| Grade C | 6(7.1%) | 6(10.7%) |
| Biliary leak | | 7(8.2%) | 4(7.1%) | 0.813 a |
| Postoperative bleeding | | 18(21.2%) | 17(30.4%) | 0.217 a |
| Postoperative infection | | 15(17.6%) | 11(19.6%) | 0.765 a |
| Postoperative DGE | | 14(16.5%) | 15(26.8%) | 0.138 a |
| Complications | | 51(60.0%) | 37(66.1%) | 0.466 a |
| Severe complications | | 12(14.1%) | 15(26.8%) | 0.061 a |
| Perioperative death | | 4(4.7%) | 2(3.6%) | 0.744 a |

a Chi-square test

Table S4 Preoperative baseline data of direct surgery group and PBD group in all jaundiced patients

|  | | Direct surgery group (n=45) | PBD group  (n=96) | *P* value |
| --- | --- | --- | --- | --- |
| Gender(n) | |  |  |  |
|  | Male | 29(64.4%) | 61(63.5%) | 0.917 a |
| Female | 16(35.6%) | 35(36.5%) |
| Age(y) | | 58.64±11.38 | 64.13±7.86 | 0.005 b |
| BMI(kg/m2) | | 24.04±3.16 | 23.9±2.97 | 0.807 b |
| Hypertension(n) | | 14(31.1%) | 46(47.9%) | 0.060 a |
| Diabetes(n) | | 12(26.7%) | 29(30.2%) | 0.666 a |
| Highest TB(μmol/L) | | 154.42±101.26 | 267.57±145.85 | <0.001 b * |
| Preoperative TB(μmol/L) | | 150.65±87.48 | 139.19±94.31 | 0.493 b |
| Preoperative ALT(U/L) | | 198.78±153.99 | 111.28±79.81 | <0.001 b * |
| Preoperative ALB(g/L) | | 35.44±4.11 | 35.03±3.22 | 0.559 b |
| Preoperative HGB(g/L) | | 122.13±17.08 | 121.56±17.16 | 0.854 b |
| Preoperative PT(s) | | 11.74±1.25 | 12.11±1.25 | 0.101 b |
| Preoperative APTT(s) | | 28.37±12.77 | 29.05±7.56 | 0.694 b |
| Surgical methods(n) | |  |  |  |
|  | Open | 35(77.8%) | 60(62.5%) | 0.163 a |
| Laparoscopic transfer opening | 1(2.2%) | 7(7.3%) |
| Laparoscopic | 9(20.0%) | 29(30.2%) |
| Duration of surgery(min) | | 225.0(187.5, 257.5) | 235.0(200.0, 307.7) | 0.082 c |
| Blood loss(ml) | | 300.0(125.0, 600.0) | 300.0(200.0, 500.0) | 0.813 c |

a Chi-square test b T-test c Mann whitney test *Significant difference

Table S5 Comparison of short-term postoperative complications between the direct surgery group and PBD group in all jaundiced patients

| Postoperative complications (n) | | Direct surgery group | PBD group | *P* value |
| --- | --- | --- | --- | --- |
| (n=45) | (n=96) |
| Pancreatic fistula | |  |  |  |
|  | Non-CR-POPF | 36(80.0%) | 76(79.2%) | 0. 837 a |
|  | Grade B | 6(13.3%) | 11(11.5%) |
| Grade C | 3(6.7%) | 9(9.4%) |
| Biliary leak | | 4(8.9%) | 7(7.3%) | 0.742 a |
| Postoperative bleeding | | 10(22.2%) | 25(26.0%) | 0.625 a |
| Postoperative infection | | 7(15.6%) | 19(19.8%) | 0.545 a |
| Postoperative DGE | | 9(20.0%) | 20(20.8%) | 0.909 a |
| Complications | | 26(57.8%) | 62(64.6%) | 0.437 a |
| Severe complications | | 8(17.8%) | 19(19.8%) | 0.777 a |
| Perioperative death | | 1(2.2%) | 5(5.2%) | 0.413 a |

a Chi-square test

Table S6 Preoperative baseline data of direct surgery group and PBD group in the mild jaundiced patients

|  | | Direct surgery group  (n=39) | PBD group  (n=46) | *P* value |
| --- | --- | --- | --- | --- |
| Gender(n) | |  |  |  |
|  | Male | 25(64.1%) | 27(58.7%) | 0.610 a |
| Female | 14(35.9%) | 19(41.3%) |
| Age(y) | | 58.38±12.07 | 63.65±7.82 | 0.022 b * |
| BMI(kg/m2) | | 24.15±3.18 | 23.91±3.06 | 0.720 b |
| Hypertension(n) | | 11(28.2%) | 20(43.5%) | 0.145 a |
| Diabetes(n) | | 11(28.2%) | 15(32.6%) | 0.661 a |
| Preoperative TB(μmol/L) | | 211.72±157.57 | 118.09±78.22 | 0.001 b * |
| Preoperative ALT(U/L) | | 125.41±58.83 | 99.22±71.11 | 0.071 b |
| Preoperative ALB(g/L) | | 35.19±4.16 | 35.68±3.17 | 0.539 b |
| Preoperative HGB(g/L) | | 121.92±17.71 | 126.43±17.61 | 0.244 b |
| Preoperative PT(s) | | 11.59±1.10 | 11.81±1.05 | 0.340 b |
| Preoperative APTT(s) | | 28.69±13.68 | 27.85±6.89 | 0.717 b |
| Surgical methods(n) | |  |  |  |
|  | Open | 9(23.1%) | 14(30.4%) | 0.467 a |
| Laparoscopic transfer opening | 1(2.6%) | 3(6.5%) |
| Laparoscopic | 23(27.1%) | 15(26.8%) |
| Duration of surgery(min) | | 230.0(190.0,260.0) | 230.0(188.8,306.8) | 0.522 c |
| Blood loss(ml) | | 350.0(150.0,600.0) | 300.0(200.0,525.0) | 0.989 c |

a Chi-square test b T-test c Mann whitney test *Significant difference
